# Supplementary material for: Tilapia Lake Virus Does Not Hemagglutinate Avian and Piscine Erythrocytes and NH4Cl Does Not Inhibit Viral Replication In Vitro
Source: MDPI journal article supplement (doi:10.3390/v11121152), 2019-12-12
Supplement: s1 [file s1]

## SUPPLEMENTARY MATERIAL

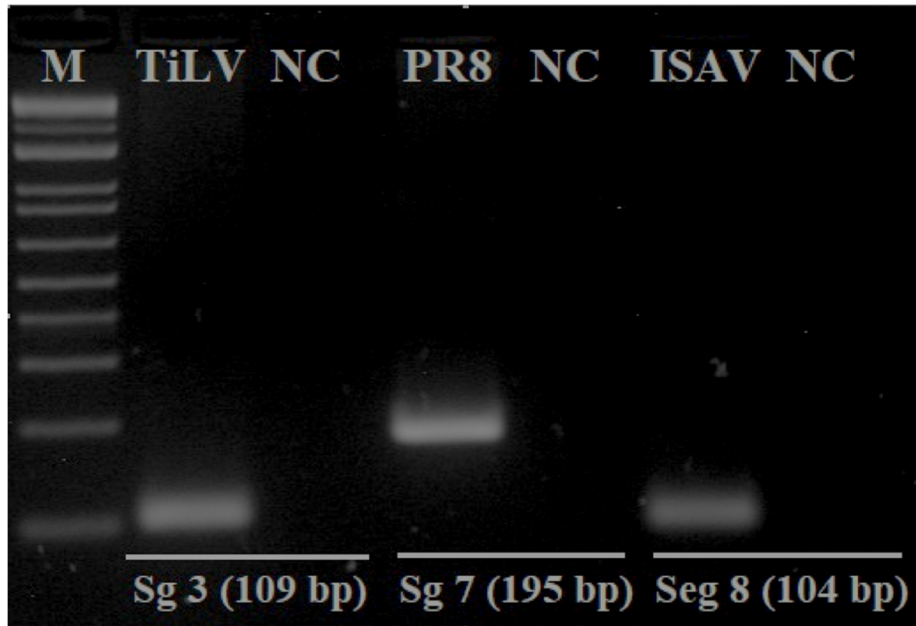

**Figure S1.** Gel electrophoresis verification of the viruses used for hemagglutination assay. Lane M: DNA ladder (Marker); lane TiLV: Tilapia lake virus, lane PR8: Influenza virus A PR8; lane ISAV: Infectious salmon anemia virus and lane NC: Negative control (RNase-free water).

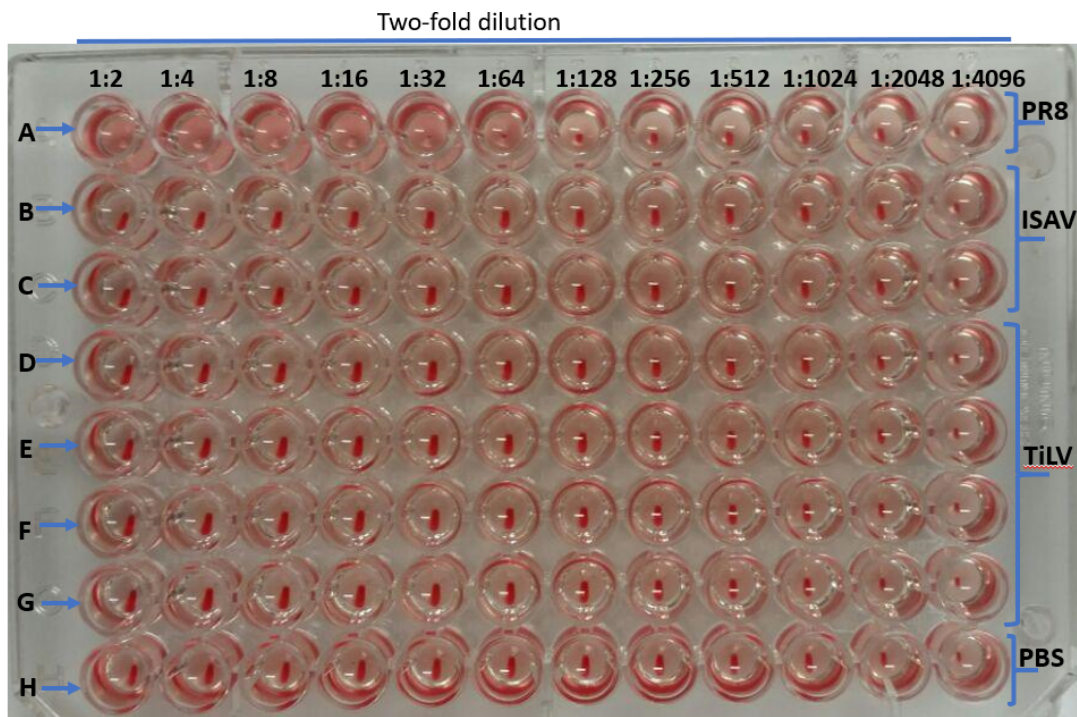

**Figure S2.** Hemagglutination of turkey red blood cells by influenza PR8 (512HA/50 $\mu$ l), ISAV ( $10^6$  TCID<sub>50</sub>/mL), TiLV ( $10^7$ ,  $10^6$ ,  $10^5$  and  $10^4$  TCID<sub>50</sub>/mL wells D to G, respectively) after 1 h incubation at room temperature. Stripping of turkey RBCs in a hemagglutination plate tilted at 60 degrees angle.

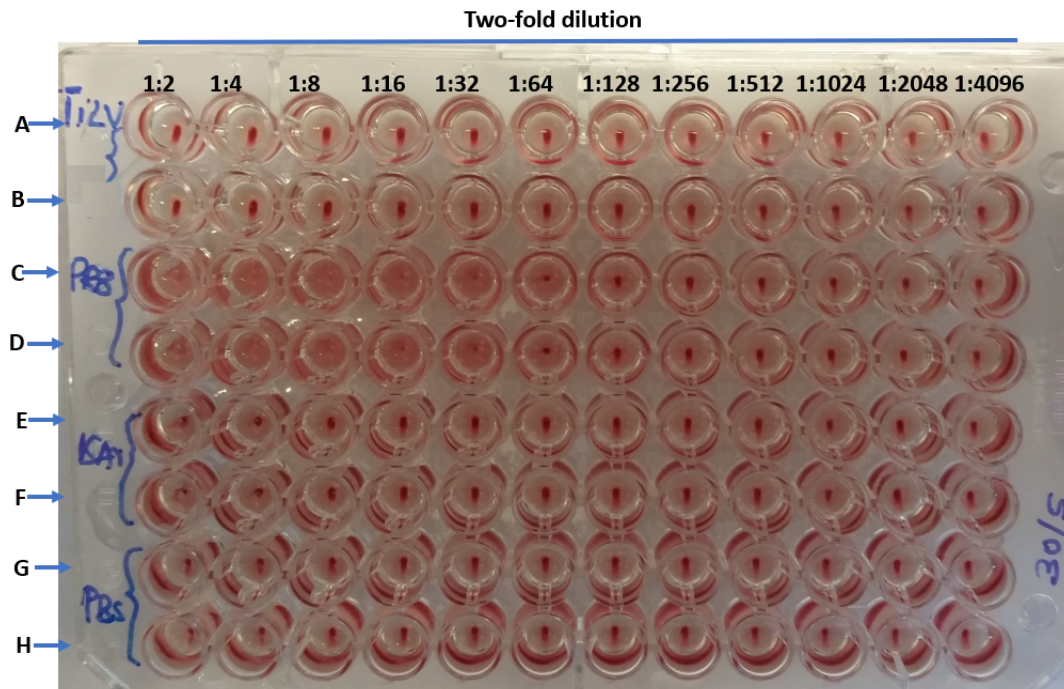

**Figure S3.** Hemagglutination of tilapia red blood cells by Influenza PR8 (512HA/50 $\mu$ l), ISAV ( $10^6$  TCID<sub>50</sub>/mL), and TiLV ( $10^7$  TCID<sub>50</sub>/mL) after 1 h incubation at room temperature. Stripping of tilapia RBCs in a hemagglutination plate tilted at 60 degrees angle.

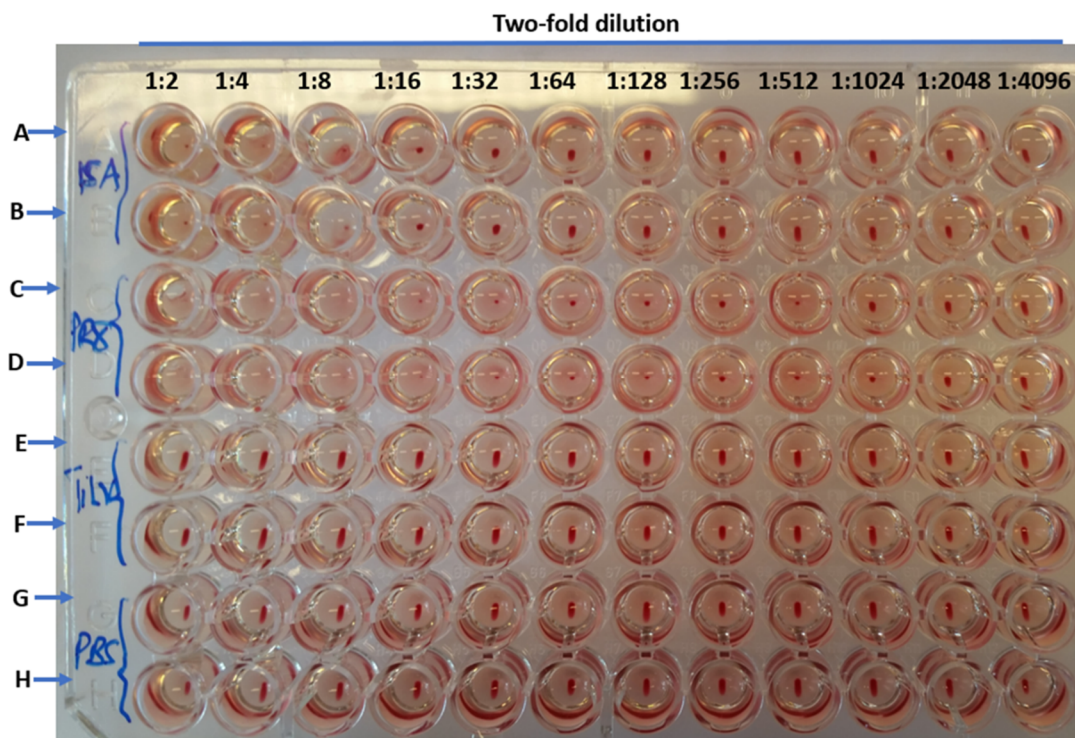

**Figure S4.** Hemagglutination assay of Atlantic salmon red blood cells by Influenza PR8 (512HA/50 $\mu$ l), ISAV ( $10^6$  TCID<sub>50</sub>/mL), and TiLV ( $10^7$  TCID<sub>50</sub>/mL) after 1 h incubation at room temperature. Stripping of Atlantic salmon RBCs in a hemagglutination plate tilted at 60 degrees angle.



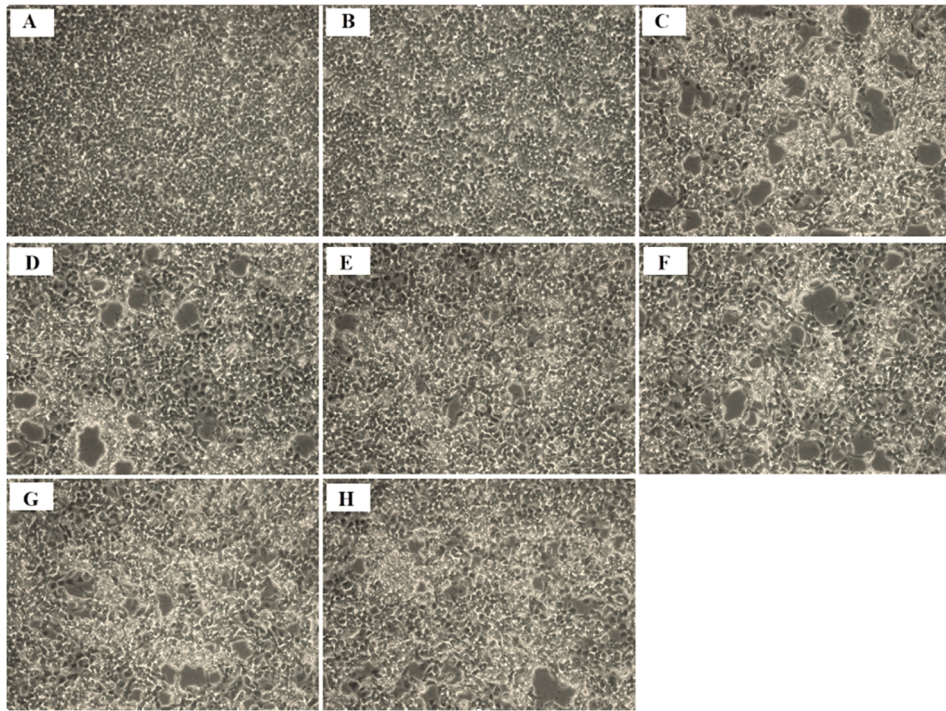

**Figure S5.** Ammonium chloride treatment of E-11 cells infected by TiLV at 0, 1, 2 and 3 hours post infection. Replication inhibition of TiLV in E-11 using 30 mM of Ammonium chloride ( $\text{NH}_4\text{Cl}$ ) 3 dpi (10X magnification). **Figure 5A:** Negative control (untreated cells), **Figure 5B:** Negative control (treated cells), **Figure 5C:** Positive control, **Figure 5D:**  $\text{NH}_4\text{Cl}$  added 30 minutes before infection, **Figure 5E:**  $\text{NH}_4\text{Cl}$  added during adsorption, **Figure 5F:**  $\text{NH}_4\text{Cl}$  added 1 hpi, **Figure 5G:**  $\text{NH}_4\text{Cl}$  added 2 hpi and **Figure 5H:**  $\text{NH}_4\text{Cl}$  added 3 hpi.
